# Supplementary material for: Designed synthesis of multi-functional PEGylated Yb2O3:Gd@SiO2@CeO2islands core@shell nanostructure
Source: Royal Society of Chemistry journal article supplement (doi:10.1039/c6dt02044e), 2016-01-01
Supplement: c6dt02044e1.pdf [file c6dt02044e1.pdf]

**Electronic Supplementary Information (ESI)**

**Designed Synthesis of Multi-functional PEGylated**

**Yb<sub>2</sub>O<sub>3</sub>:Gd@SiO<sub>2</sub>@CeO<sub>2</sub> Islands Core@Shell Nanostructure**

Junqi Li,<sup>ab</sup> Shuang Yao,<sup>\*a</sup> Shuyan Song,<sup>a</sup> Xiao Wang,<sup>a</sup> Yinghui Wang,<sup>a</sup> Xing Ding,<sup>c</sup> Fan Wang,<sup>ab</sup> and Hongjie Zhang<sup>\*a</sup>

Table S1. Result of EDS corresponding to Figure 1F.

| Element | Series | unn. C <sup>[a]</sup> | norm. C <sup>[b]</sup> | Atom. C <sup>[c]</sup> |
|---------|--------|-----------------------|------------------------|------------------------|
| O       | K      | 32.32                 | 36.28                  | 64.68                  |
| Si      | K      | 25.84                 | 29.00                  | 29.46                  |
| Ce      | L      | 0.66                  | 0.74                   | 0.15                   |
| Gd      | L      | 5.84                  | 6.56                   | 1.19                   |
| Yb      | L      | 24.43                 | 27.42                  | 4.52                   |
| Total:  |        | 89.09                 | 100.00                 | 100.00                 |

[a] unnormalized content (wt %). [b] normalized content (wt %). [c] atomic content (at %).

Table S2. Result of ICP-MS for PEGylated Yb<sub>2</sub>O<sub>3</sub>:Gd@SiO<sub>2</sub>@CeO<sub>2</sub>.

| Analyte | Content (μg g <sup>-1</sup> ) |
|---------|-------------------------------|
| Yb3289  | 282700                        |
| Gd3350  | 69090                         |
| Ce4040  | 5224                          |
